# Supplementary material
Source: MDPI journal article supplement (https://www.mdpi.com/2076-3417/12/21/10998)
Supplement: s1 [file s1]

Supplementary material

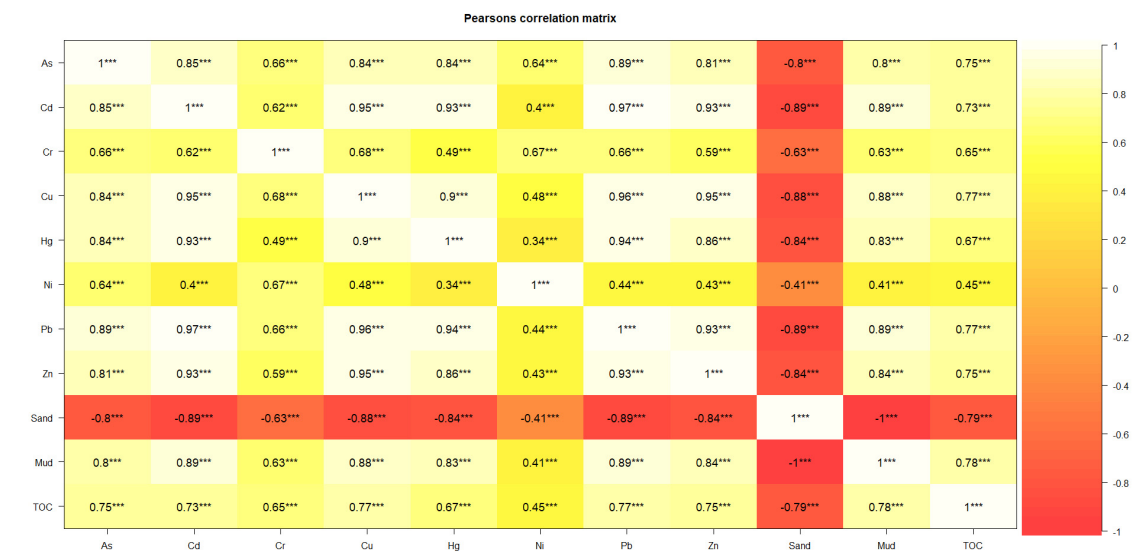

**Figure S1.** Pearsons correlation matrix of the concentrations of As, Cd, Cr, Cu, Hg, Ni, Pb, Zn, TOC and grain size in surface sediments of the Aviles estuary and the nearby coastal area. Symbols and colours: \*\*\* - degree of statistical significance ( $p < 0,001$ ); reddish colours denote negative correlations; yellowish to light colours denote positive correlations.

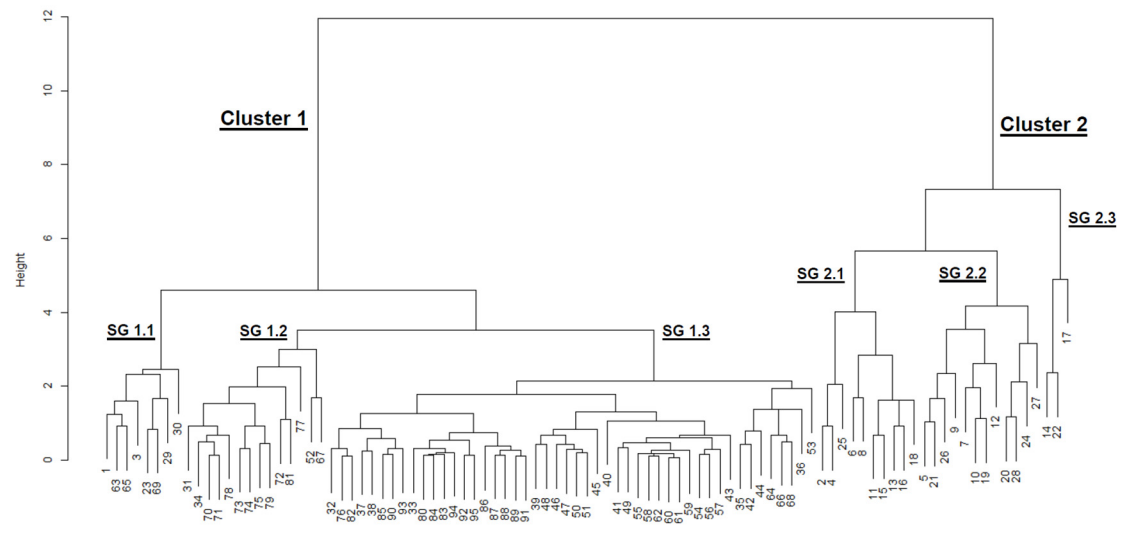

**Figure S2.** Cluster hierarchy analysis based on the coefficients of the PCA multivariate analysis with varimax rotation. Abbreviation SG-subgroup.

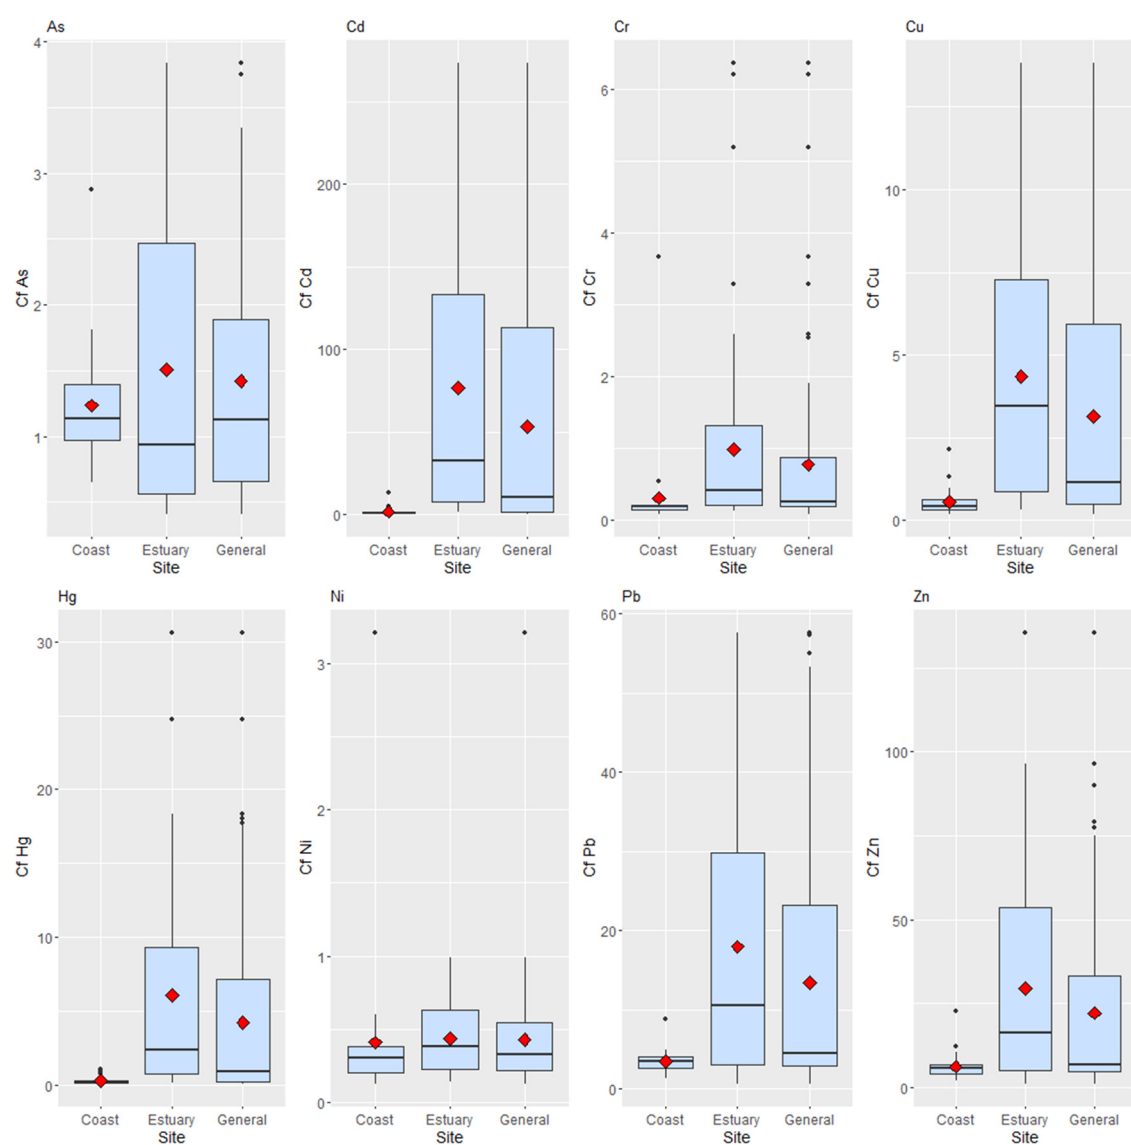

**Figure S3.** Comparison of the  $C_f$  values between the estuary samples, coastal samples and the general area comprising both environments. Red dots mark mean value of each dataset.
